1 **25-Hydroxycholesterol amplifies microglial IL-1 $\beta$  production in an apoE isoform-**  
2 **dependent manner**

3

4 Man Ying Wong<sup>1</sup>, Michael Lewis<sup>2</sup>, James J. Doherty<sup>2</sup>, Yang Shi<sup>3</sup>, Patrick M. Sullivan<sup>4</sup>,  
5 Mingxing Qian<sup>5</sup>, Douglas F. Covey<sup>5</sup>, Gregory A. Petsko<sup>1</sup>, David M. Holtzman<sup>3</sup>, Steven M.  
6 Paul<sup>2,6\*</sup>, Wenjie Luo<sup>1\*</sup>

7

8 Contact information:

9 <sup>1</sup>Appel Alzheimer's Disease Research Institute, Feil Family Brain and Mind Research  
10 Institute, Weill Cornell Medicine, New York, USA

11 <sup>2</sup>Sage Therapeutics, Cambridge, Massachusetts, USA

12 <sup>3</sup>Department of Neurology, Hope Center for Neurological Disorders, Charles F. and  
13 Joanne Knight Alzheimer's Disease Research Center, Washington University School of  
14 Medicine, St. Louis, Missouri, USA.

15 <sup>4</sup>Department of Medicine, Duke University Medical Center, Durham Veterans Health  
16 Administration Medical Center's Geriatric Research, Education and Clinical Center,  
17 Durham, NC, USA

18 <sup>5</sup>Departments of Developmental Biology, Anesthesiology, Taylor Family Institute for  
19 Innovative Psychiatric Research, Washington University in St. Louis, 660 South Euclid  
20 Avenue, St. Louis, MO 63110, USA

21 <sup>6</sup>Departments of Neurology and Psychiatry, Hope Center for Neurological Disorders,  
22 Taylor Family Institute, Washington University School of Medicine, St. Louis, Missouri,  
23 USA

24

25

26

27 To whom correspondence should be addressed:

28

29 \*Wenjie Luo, Appel Alzheimer's Disease Research Institute, Feil Family Brain and Mind  
30 Research Institute, Weill Cornell Medicine, New York, NY, USA

31 email: [wel2009@med.cornell.edu](mailto:wel2009@med.cornell.edu)

32

33 \*Steven M. Paul, Departments of Neurology and Psychiatry, Hope Center for Neurological  
34 Disorders, and Taylor Family Institute, Washington University School of Medicine, St.  
35 Louis, Missouri, USA

36 email: [smpaulmd@gmail.com](mailto:smpaulmd@gmail.com)

37

38

39 **Abstract:**

40 Genome-wide association studies associated with Alzheimer's disease (AD) have  
41 implicated pathways related to both lipid homeostasis and innate immunity in the  
42 pathophysiology of AD. However, the exact cellular and chemical mediators of  
43 neuroinflammation in AD remain poorly understood. The oxysterol 25-hydroxycholesterol  
44 (25-HC) is an important immunomodulator produced by peripheral macrophages with  
45 wide-ranging effects on cell signaling and innate immunity. Genetic variants of the  
46 enzyme responsible for 25-HC production, cholesterol 25-hydroxylase (CH25H), have  
47 been found to be associated with AD. In the present study, we found that the CH25H  
48 expression is upregulated in human AD brain tissue and in transgenic mouse brain tissue  
49 bearing amyloid- $\beta$  (A $\beta$ ) plaques or tau pathology. Treatment with the toll-like receptor 4  
50 (TLR4) agonist lipopolysaccharide (LPS) markedly upregulates CH25H expression in the  
51 mouse brain *in vivo*. LPS also stimulates CH25H expression and 25-HC secretion in  
52 cultured mouse primary microglia. We also found that LPS-induced microglial production  
53 of the pro-inflammatory cytokine IL1 $\beta$  is markedly potentiated by 25-HC and attenuated  
54 by genetic deletion of CH25H. Microglia expressing apolipoprotein E4 (apoE4), a genetic  
55 risk factor for AD, produce greater amounts of 25-HC than apoE3-expressing microglia  
56 following treatment with LPS. Remarkably, treatment of microglia with 25-HC results in a  
57 much greater level of IL1 $\beta$  secretion in LPS-activated apoE4-expressing microglia than in  
58 apoE2- or apoE3-expressing microglia. Blocking potassium efflux or inhibiting caspase-1  
59 prevents 25-HC-potentiated IL1 $\beta$  release in apoE4-expressing microglia, indicating the  
60 involvement of caspase-1/NLRP3 inflammasome activity. 25-HC may function as a

61 microglial secreted inflammatory mediator in brain, promoting IL1 $\beta$ -mediated  
62 neuroinflammation in an apoE isoform-dependent manner (E4>>E2/E3) and thus may be  
63 an important mediator of neuroinflammation in AD.

64

65 **Introduction**

66

67           Neuroinflammation is a prominent feature of the neuropathology of Alzheimer's  
68 disease (AD), in addition to  $\beta$ -amyloid ( $A\beta$ ) plaques and tau-containing neurofibrillary  
69 tangles (NFT) (1). Emerging evidence indicates that neuroinflammation, mediated by  
70 activated glial cells, plays a fundamental role in the pathogenesis and neurodegeneration  
71 of AD (1). Brain inflammation either triggered by or preceding AD pathology sustains  
72 and likely contributes to the progressive neurodegeneration that characterizes AD (2).  
73 Defining the molecular and cellular mechanisms underlying neuroinflammation as well as  
74 the chemical mediators of the inflammatory cascade are critical for understanding how  
75 neuroinflammation contributes to AD pathogenesis.

76           In AD, neuroinflammation increases with disease progression and is primarily  
77 driven by glial cells, especially microglia. This pathophysiological inflammatory cascade  
78 is associated with increased production of pro-inflammatory cytokines and other key  
79 inflammatory mediators (3, 4), including interleukin-1 $\beta$  (IL-1 $\beta$ ), a very potent pro-  
80 inflammatory cytokine (5-8). Higher concentrations of IL-1 $\beta$  have been reported in  
81 cerebrospinal fluid and brain tissue of AD patients (9-11) and in microglia surrounding  $A\beta$   
82 plaques (12). Sustained elevations of IL-1 $\beta$  have been postulated to play a key role in AD  
83 pathogenesis (6, 12-14). Active IL-1 $\beta$  (17kD) is produced from an inactive 31 kDa pro-IL-  
84 1 $\beta$  by the inflammasome, a multicomponent protein complex consisting of NLRP3  
85 (nucleotide-binding domain and leucine-rich repeat-containing protein 3), ASC  
86 (apoptosis-associated speck-like protein containing a CARD) and caspase-1(15). The  
87 elevations of IL-1 $\beta$  reported in AD brain strongly suggests activation of the inflammasome  
88 (16). Supporting this, aggregated  $A\beta$  has been shown to activate the inflammasome via

89 a CD36/TLR4/6-dependent mechanism (17). NLRP3 deficiency reduces amyloid  
90 deposition and rescues memory deficits in the APP/PS1 model of AD (18). Understanding  
91 the cellular mechanisms responsible for IL-1 $\beta$  production by microglia may facilitate the  
92 development of an effective AD therapeutic that reduces IL-1 $\beta$ -mediated immune  
93 signaling and associated neuroinflammation.

94 The apolipoprotein E4 (APOE4) allele is the most common and important genetic  
95 risk factor for late onset AD (19-21). In the periphery, apoE regulates lipid metabolism  
96 (22, 23). In brain, apoE functions as an important regulator of brain amyloid (amyloid  $\beta$ -  
97 peptide or A $\beta$ ) deposition and clearance (apoE2>E3>E4), which most likely accounts for  
98 one of the known mechanisms as to how APOE4 increase AD risk (24). Recently, several  
99 studies have shown that APOE4 is associated with increased innate immune reactivity  
100 and enhanced cytokine secretion in primary microglia and peripheral macrophages in  
101 various animal models as well as human subjects (25-36). We have also reported a higher  
102 innate immune reactivity of apoE4-expressing microglia following LPS treatment and  
103 found that APOE4/4 genotype greatly influences tau-dependent neuroinflammation in a  
104 tau transgenic mouse model of neurodegeneration (37). Together, these data suggest  
105 that apoE4 may exert a “toxic” gain of function to promote microglia-mediated  
106 neuroinflammation and neurodegeneration in AD.

107 25-hydroxycholesterol (25-HC) is a potent oxysterol regulator of cholesterol  
108 biosynthesis (38-40). It is converted from cholesterol by the oxidoreductase cholesterol  
109 25-hydroxylase (CH25H) (41, 42), an enzyme highly expressed and induced primarily in  
110 peripheral macrophages and dendritic cells in response to inflammatory stimuli like LPS  
111 and interferon (43, 44). Although CH25H deficiency does not cause defects in cholesterol

112 homeostasis (44, 45), 25-HC appears to serve multiple functions to regulate both innate  
113 and adaptive immunity. It acts as either an anti- or pro-inflammatory regulator involved in  
114 protection from viral infection, macrophage foam cell formation, immunoglobulin IgA  
115 production and cytokine production (44). To date, the function of CH25H and 25-HC in  
116 the central nervous system has not been well characterized. The association of CH25H  
117 with AD was first reported in a hippocampal microarray study of AD brain tissue (46) and  
118 further supported by an AlzGene meta-analysis for a sporadic AD population (47) and  
119 other AD patient-based independent systematic analyses (48-50). Upregulation of  
120 CH25H mRNA in affected brain regions in AD patients versus controls was first reported  
121 in a hippocampal microarray. Upregulation of CH25H expression has also been detected  
122 in brain tissue of AD transgenic mice (51-53). It remains unclear exactly how CH25H and  
123 its oxysterol product 25-HC are involved in AD.

124 In the present study, we investigated whether 25-HC regulates the innate immune  
125 response of microglia and whether the APOE4 allele relative to the other common APOE  
126 alleles impacts the effects of 25-HC on microglial activation. Our results demonstrate that  
127 CH25H is upregulated in AD brain tissue and AD transgenic mouse brain. We further  
128 show that 25-HC is produced by activated primary microglia and augments IL-1 $\beta$   
129 production stimulated by the TLR4 agonist LPS. Importantly microglia expressing apoE4  
130 produce much greater amounts of 25-HC and IL-1 $\beta$  in response to LPS treatment  
131 compared to apoE2- or apoE3-expressing microglia. Remarkably, 25-HC also markedly  
132 potentiates LPS-mediated IL-1 $\beta$  secretion by apoE4-expressing microglia. Inhibition of  
133 inflammasome activity markedly reduces augmentation of microglial IL-1 $\beta$  secretion by  
134 25-HC. Our results suggest that 25-HC may function as an inflammatory mediator of the

135 IL-1 $\beta$ -dependent inflammatory cascade in microglia and thus, may contribute to apoE4-  
136 dependent neuroinflammation and neurodegeneration in AD.

137

138 **Results:**

139

140 **CH25H is upregulated in human AD brain and AD-related transgenic mouse brain.**

141 We first examined the expression of CH25H in postmortem human AD brain tissue. Using

142 quantitative PCR, we observed that the level of CH25H mRNA was significantly

143 upregulated in frontal cortical tissue of AD brain (n=14) compared to age-matched (non-

144 AD) controls (n=9,  $p<0.05$ ) (Fig.1a, all subjects were age>80 and both genders included).

145 The protein level of CH25H was also increased in AD brain tissue as detected by Western

146 Blot using a CH25H antibody (Fig. 1b). The increased levels of CH25H mRNA and protein

147 were also observed in the frontal cortex of 4-mo old APPPS1-21 mice bearing amyloid

148 plaques (54) (Fig.1c, d, e). We further examined the expression of CH25H in PS19 mice

149 expressing the human P301S tau mutation at 9-mo of age bearing massive tau pathology,

150 inflammation and neurodegeneration in brain (55). Compared to their age-matched non-

151 tg littermates, we detected an increase of CH25H mRNA in the brain of PS19 tg mice

152 (Fig. 1f). Moreover, when we measured CH25H mRNA levels in the frontal cortex of

153 P301S tau transgenic mice that are homozygous for human APOE2 (TE2), APOE3 (TE3),

154 APOE4 (TE4) or with no expression of apoe (TEKO) using nanostring analysis, we found

155 that TE4 mice, an aggressive mouse model showing the strongest brain

156 neurodegeneration and neuroinflammation (37), express significantly higher levels of

157 CH25H mRNA than TEKO mice, and also showed higher levels of CH25H expression

158 than TE2 or TE3 mice although these comparisons did not reach statistical significance

159 (Fig. 1g). Together these data suggest that CH25H expression is upregulated in human

160 AD brain and mouse brain when there is prominent amyloid or tau pathology and  
161 neuroinflammation. Given that we measured CH25H mRNA and protein in brain tissue  
162 and not in individual microglia, these data are all the more noteworthy.

163 **LPS stimulates 25-HC production and CH25H expression in primary microglia.** In  
164 macrophages, the TLR4 agonist lipopolysaccharide (LPS) stimulates expression of  
165 CH25H and production of 25-HC (43). In the central nervous system, CH25H is mainly  
166 expressed in microglia, the counterpart of peripheral macrophages, with very limited  
167 expression, if any, in other brain cell types, based on the Stanford transcriptome database  
168 generated by Barres group (<http://www.brainrnaseq.org>) (Supplemental Fig.1a). To  
169 explore a potential role for CH25H and its oxysterol product 25-HC in microglia-mediated  
170 innate immunity, we first measured 25-HC production by LC/MS in cultured microglia  
171 isolated from brain tissue of neonatal wild type mice in response to stimulation by LPS. A  
172 time- and dose-dependent increase of 25-HC production was observed in the cell lysate  
173 and medium of LPS-treated microglia compared to untreated microglia (Fig. 2a, b). As  
174 measured by qPCR, LPS stimulated the expression of the pro-inflammatory cytokines IL-  
175  $1\beta$  and  $TNF\alpha$  as well as inflammasome genes such as NLRP3. It also potently  
176 upregulated CH25H mRNA in microglia ( $\geq 50$  fold) (Fig. 2c). The increase in CH25H  
177 expression induced by LPS was further confirmed by Western blot using a CH25H  
178 specific antibody (Fig. 2c, insert). We next evaluated the effects of LPS on CH25H  
179 expression in the mouse *in vivo*. Wild type mice were treated with LPS (8.2mg/kg via i.p.)  
180 for 24 hrs, a marked increase in CH25H mRNA was detected in the hippocampus and  
181 cerebral cortex of LPS-treated mice compared to vehicle-treated mice (Fig. 2d). In  
182 contrast, the expression of CYP27a1 or CYP7b1 (two other enzymes involved in the



183 cholesterol:oxysterol metabolic pathway) were not influenced by LPS treatment (Fig. 2d),  
184 suggesting that the induction of CH25H by LPS was highly specific. These results  
185 demonstrate that the production of 25-HC and the expression of CH25H are highly  
186 responsive to TLR4 stimulation in cultured primary microglia as well as in mouse brain *in*  
187 *vivo*.

188 **Depletion of 25-HC selectively attenuates LPS-induced IL-1 $\beta$  expression in primary**  
189 **microglia.** To examine whether 25-HC is involved in the inflammatory response of  
190 microglia, we eliminated 25-HC production using microglia prepared from CH25H  
191 knockout (KO) mice (supplementary Fig. 1b). When WT or CH25H KO microglia were  
192 treated with LPS, we observed a significant reduction in the level of IL-1 $\beta$  secreted into  
193 the medium of CH25H KO microglia compared to WT microglia (Fig. 3a). The levels of  
194 IL-1 $\alpha$ , a cytokine often co-released with IL-1 $\beta$ , were also reduced (Fig. 3b). In contrast,  
195 the production of TNF $\alpha$  (Fig. 3c) or IL-6 (not shown) were similar in both WT and CH25H  
196 KO cells treated with LPS. The addition of 25-HC to CH25H KO microglia fully rescued  
197 the attenuated IL-1 $\beta/\alpha$  production observed in CH25H KO microglia to a comparable level  
198 as WT microglia (Fig. 3d). These data suggest that 25-HC contributes to the LPS-  
199 triggered IL-1 $\beta$  production by microglia. To directly evaluate the effect of 25-HC on IL-  
200 1 $\beta/\alpha$  production, we treated WT microglia with 25-HC alone or in combination with LPS.  
201 Compared to LPS treatment alone, the addition of 25-HC in the presence of LPS resulted  
202 in a marked dose-dependent increase of microglial IL-1 $\beta$  and IL-1 $\alpha$  secretion while 25-  
203 HC treatment alone had no effect (Fig. 3e).

204

205 Mature IL-1 $\beta$  (17kDa) is produced from its 31 kDa pro-IL-1 $\beta$  by the inflammasome  
206 complex and rapidly secreted into medium. We next examined the effects of 25-HC on  
207 the level of pro-IL-1 $\beta$  protein remaining in cells and mature IL-1 $\beta$  protein released into the  
208 medium by Western blotting. LPS treatment markedly increased the cellular level of pro-  
209 IL-1 $\beta$  as well as the inflammasome proteins NLRP3 and ASC1, resulting in a limited  
210 amount of 17kDa IL-1 $\beta$  produced and secreted into the medium. However, the addition  
211 of 25-HC markedly and dose-dependently stimulated the release of active 17kDa IL-1 $\beta$   
212 into the medium (Fig. 3f). The intracellular protein levels of unprocessed pro-IL-1 $\beta$ ,  
213 NLRP3 or ASC were not influenced by the presence of 25-HC (Fig. 3f). Therefore, 25-HC  
214 may regulate IL-1 $\beta$  production at a posttranslational level. Together, these results suggest  
215 that 25-HC modulates LPS-activated inflammatory responses by selectively promoting  
216 mature IL-1 $\beta$  production.

217

218 **APOE4-expressing microglia show exaggerated IL-1 $\beta$  production in response to**  
219 **LPS and 25-HC treatment.** Previous studies have shown that APOE isoforms  
220 differentially influence the innate immune response of microglia (26, 27). We therefore  
221 examined the effects of the common APOE isoforms on both LPS and 25-HC-enhanced  
222 production of IL-1 $\beta$  in microglia. Microglia were prepared from neonatal mice expressing  
223 human APOE2 (E2), APOE3 (E3), or APOE4 (E4) at the mouse APOE locus (56-58).  
224 Consistent with previous reports, E4-expressing microglia produced higher levels of IL-  
225 1 $\beta$  than E2-expressing cells or APOE deficient cells (EKO) after 6 h (Fig. 4a) or 24 h (Fig.  
226 4b) following LPS treatment alone. As expected, 25-HC dose-dependently increased IL-  
227 1 $\beta$  production at 6 h (Fig. 4a) and at 24 h (Fig. 4b). Strikingly, co-incubation with 25-HC

228 resulted in a marked potentiation of IL-1 $\beta$  production in E4-expressing microglia  
229 compared to E2-expressing or EKO microglia at each concentration of 25-HC tested (Fig.  
230 4a and 4b), resulting in significantly higher levels of IL-1 $\beta$  production from E4 microglia  
231 than that from E2 or EKO microglia (Fig. 4a and 4b). Although LPS induced greater IL-6  
232 production in E4-expressing microglia, 25-HC treatment did not influence the production  
233 of IL-6 (Fig. 4c). We further compared the IL-1 $\beta$ -inducing activity of 25-HC between E4  
234 and E3 microglia. A higher amount of secreted (extracellular) IL-1 $\beta$  was observed in E4  
235 microglia than in E3 microglia treated with both LPS and 25-HC (Fig. 4d). Consistently  
236 we detected more mature IL-1 $\beta$  protein (17kd) in the medium of E4 microglia than in the  
237 medium of E3 microglia, while the levels of intracellular pro-IL-1 $\beta$  did not increase in cells  
238 treated with 25-HC (Fig. 4e). Together, these data demonstrate that apoE isoforms  
239 differentially influence the ability of 25-HC to augment the secretion of IL-1 $\beta$  production  
240 in LPS-activated microglia and the presence of APOE4 markedly augments the effects of  
241 25-HC in promoting IL-1 $\beta$  production, shifting the dose-response for 25-HC substantially  
242 to the left. Lastly, the production of 25-HC by E2 or E4-expressing microglia was  
243 measured. We also found that E4 microglia produced greater amount of 25-HC measured  
244 in both cells and medium than E2 microglia when treated with LPS (Fig. 4f).

245

246 **Augmentation of LPS-induced IL-1 $\beta$  induction by 25-HC is enantioselective.** To  
247 examine the specificity of 25-HC, we first tested the effects of both the 25-HC precursor  
248 cholesterol and another cholesterol metabolite 7 $\alpha$ -HC on IL-1 $\beta$  production. Comparing to  
249 the promoting effects of 25-HC on IL-1 $\beta$ / $\alpha$  production, coincubation of cholesterol or 7 $\alpha$ -  
250 HC with LPS at a similar concentration as 25-HC did not promote LPS-induced IL-1 $\beta$ / $\alpha$

251 production in microglia (Fig. 5a, b, c). We further evaluated the IL-1 $\beta$ -inducing activity of  
252 *ent*-25-HC, the inactive enantiomer of 25-HC (59), and found that *ent*-25HC exhibited only  
253 very weak IL-1 $\beta$ -inducing activity and was at least an order of magnitude less potent than  
254 25-HC (Fig. 5d). These results demonstrate that the IL-1 $\beta$  induction by 25-HC is  
255 enantioselective and thus likely mediated via a specific protein target(s).

256

257 **25-HC induces IL-1 $\beta$  via activation of caspase-1 and the inflammasome.** Active 17kD  
258 IL-1 $\beta$  is produced from pro-IL-1 $\beta$  after proteolytic cleavage by caspase-1. Formation of  
259 ASC, recognized as large perinuclear cellular aggregates, is a hallmark of inflammasome  
260 activation that correlates with caspase-1 cleavage and release of mature IL-1 $\beta$  (60). To  
261 further address if 25-HC activates the inflammasome in microglia, we compared the  
262 number of cells with adaptor protein apoptosis associated speck-like protein containing a  
263 CARD (ASC) speck in microglia treated with LPS alone or LPS combined with 25-HC.  
264 The number of ASC speck-containing cells significantly increased following treatment with  
265 LPS and 25-HC compared to LPS alone (Fig. 6a). 25-HC treatment alone, however, did  
266 not induce ASC speck formation (Fig. 6a, b). We further found that the induction of ASC  
267 speck by LPS and 25-HC is dependent on TLR4, because no ASC speck formation was  
268 detected in TLR4 KO microglia treated with LPS and 25-HC (Fig. 6c, d). The induction of  
269 IL-1 $\beta$  by LPS and 25-HC was also markedly reduced or eliminated in TLR4 KO microglia  
270 (Fig. 6c, d). These data suggest that 25-HC augments IL-1 $\beta$  secretion via activation of  
271 the inflammasome in a TLR4-dependent manner. Activation of NLRP3 inflammasome  
272 triggers oligomerization of caspase-1 that cleaves pro-IL-1 $\beta$  to biologically active IL-1 $\beta$ .  
273 To examine if the induction of IL-1 $\beta$  by 25-HC is caspase-1-dependent, primary microglia

274 were treated with LPS and 25-HC in the presence of VX765, a prodrug of VRT-043198  
275 that selectively inhibits the caspase-1 subfamily of cysteine proteases (61). Treatment  
276 with VX765 completely inhibited the effect of 25-HC on IL-1 $\beta$  production (Fig. 6e),  
277 suggesting that 25-HC induces IL-1 $\beta$  production by activating the inflammasome and  
278 caspase-1. Potassium efflux is one of the common mediators of NLRP3 inflammasome  
279 activation in response to diverse stimuli (15). When potassium efflux was blocked by a  
280 high concentration of extracellular KCl, we found that the induction of IL-1 $\beta$  by LPS and  
281 25-HC was effectively prevented by 50mM KCl (Fig. 6f). This result confirms that  
282 activation of the inflammasome by LPS is augmented by 25-HC and further suggests that  
283 25-HC regulates IL-1 $\beta$  induction upstream of potassium efflux.

284

285

## 286 **Discussion**

287

288 **CH25H and 25-HC in innate immunity.** 25-hydroxycholesterol (25-HC) is an  
289 enzymatically derived oxidation product of cholesterol which is produced primarily by  
290 circulating and tissue-resident macrophages and which has been reported to have both  
291 anti-inflammatory as well as proinflammatory effects in various model systems of innate  
292 immunity (44). The enzyme cholesterol-25-hydroxylase (CH25H) which catalyzes the  
293 synthesis of 25-HC from cholesterol is markedly upregulated in macrophages following  
294 stimulation with interferon and the TLR4 ligand, LPS (43). 25-HC has also been reported  
295 to regulate cholesterol metabolism by suppressing cholesterol biosynthesis via SREBP  
296 processing and facilitating reverse cholesterol transport via activation of liver X receptors  
297 (LXRs) and various downstream genes (62). 25-HC has been shown to be a potent  
298 antiviral oxysterol and likely mediates the antiviral action of interferons against a variety

299 of enveloped DNA and RNA viruses (44, 63). Although 25-HC's anti-inflammatory actions  
300 have been widely documented (see below), it has also been reported to have  
301 proinflammatory effects and may contribute to the tissue damage in mice observed  
302 following influenza infection by acting as an amplifier of inflammation by macrophages via  
303 an AP-1-mediated mechanism (64). CH25H deficient mice have also been reported to  
304 show decreased inflammatory-mediated pathology and death following influenza infection  
305 (64), reduced immune responses following experimental autoimmune encephalomyelitis  
306 (EAE)(65) and in a mouse model of X-linked adrenoleukodystrophy (X-ALD) (66), again  
307 supporting a proinflammatory and potentially "toxic" function of 25-HC. Moreover, 25-HC  
308 was recently identified as an integrin ligand and to directly induce a proinflammatory  
309 response in macrophages (67).

310 In our study we show that CH25H is expressed in microglia *in vitro* and further  
311 demonstrate that the TLR4 agonist LPS induces a marked upregulation of CH25H  
312 expression and 25-HC production and secretion. This increase in CH25H expression and  
313 25-HC production in microglia was accompanied by corresponding increases in the  
314 secretion of the inflammatory cytokines IL-1 $\beta$ , IL-1 $\alpha$ , and TNF $\alpha$ . Reductions in both LPS-  
315 stimulated IL-1 $\beta$  and IL-1 $\alpha$  secretion (but not TNF $\alpha$  secretion) were observed in CH25H-  
316 deficient microglia, suggesting an autocrine or paracrine effect of 25-HC in amplifying  
317 proinflammatory signaling in microglia (see below). Treatment of CH25H-deficient  
318 microglia with 25-HC restored the effect of LPS on IL-1 $\beta$ / $\alpha$  secretion. We also observed  
319 an increase in CH25H mRNA following LPS treatment of wild-type mice *in vivo*, consistent  
320 with the *in vitro* microglia data.

321

322 **Possible roles of CH25H and 25-HC in AD.** CH25H is located on chromosome 10q23,  
323 a region strongly linked to AD (47). In a large scale AlzGene meta-analysis including 1282  
324 AD patients and 1312 controls from five independent populations (French, Russian, USA,  
325 Swiss, Mediterranean), a significant association of rs13500 'T' allele and haplotypes in  
326 CH25H promoter were found to be significantly associated with the risk of developing AD  
327 and with different rates of A $\beta$ /amyloid deposition (47). Although the association of this  
328 rs13500 promoter polymorphism was not found in two sequent studies (68, 69), a recently  
329 study carried out in a Turkish cohort of AD subjects and controls also revealed a strong  
330 association of CH25H rs13500 and AD, and an even stronger risk factor in the presence  
331 of *APOE4* (70). More recently, several genome-wide expression studies carried out in  
332 models of accelerated aging, AD pathology and neuroinflammation have all identified  
333 CH25H as being significantly upregulated in brain (51-53). Here we also show that  
334 CH25H is upregulated in AD brain tissue compared to age-matched controls as well as  
335 in two mouse models of AD pathology; APPPS1 transgenic mice, tau transgenic mice  
336 and a recently described *APOE4*xP301S (TE4) tau transgenic mouse model of  
337 accelerated tau pathology and neurodegeneration (37). These findings suggest that 25-  
338 HC may be involved in AD pathogenesis, especially given its reported proinflammatory  
339 properties and our data on its marked potentiation of cytokine expression and secretion  
340 from microglia stimulated by the TRL4 agonist, LPS.

341

342 **CH25H, 25-HC and APOE genotype.** Given the important role of *APOE4* as a genetic  
343 risk factor for AD and its reported role in regulating innate immunity in brain (71), we  
344 examined whether CH25H expression and 25-HC production in microglia were impacted

345 by APOE genotype. First, we found that apoE4-expressing microglia produced  
346 significantly more 25-HC in response to LPS treatment than apoE2-expressing microglia.  
347 We also found that apoE4-expressing microglia produced more IL-1 $\beta$  and IL-6 in  
348 response to LPS treatment as has been previously reported (27). To our surprise, co-  
349 incubation of 25-HC with LPS markedly augmented IL-1 $\beta$  production in apoE4-expressing  
350 microglia compared to either apoE2- expressing microglia or apoE deficient (knockout)  
351 microglia, markedly shifting the dose-response curve for 25-HC to the left. In fact,  
352 relatively low concentrations of 25-HC (~1 $\mu$ M) stimulated IL-1 $\beta$  production in apoE4-  
353 expressing (vs. apoE2-expressing) microglia, again demonstrating that 25-HC's  
354 proinflammatory effects in this *in vitro* model of innate immunity are APOE isoform-  
355 dependent. Previous work has shown that treatment with LPS induces higher levels of  
356 various cytokines (including IL-1 $\beta$ ) in the serum of human APOE4 carriers than APOE3  
357 homozygotes (26) and in the brains of apoE4-expressing targeted replacement mice (27).  
358 *In vitro*, apoE4-expressing microglia exhibit higher "innate immune reactivity" following  
359 LPS treatment measured by both cytokine and NO production (27). Moreover, APOE  
360 genotype alters glial activation in response to LPS treatment (72). Together, with our *in*  
361 *vivo* data in several AD mouse models demonstrating higher brain levels of microglial and  
362 brain CH25H mRNA, we hypothesize that 25-HC may be an important proinflammatory  
363 chemical messenger whose production and secretion will greatly amplify cytokine  
364 secretion in apoE4-expressing microglia in a paracrine or autocrine manner, and may  
365 thus contribute either indirectly or even directly to the neuroinflammation and  
366 neurodegeneration that characterize AD. In this regard, Jang and colleagues (66) have  
367 recently shown that 25-HC has proinflammatory actions in a study of X-linked



368 adrenoleukodystrophy (X-ALD), a progressive neurodegenerative disorder characterized  
369 by accumulation of very long-chain fatty acids (VLCFA). They observed that 25-HC is  
370 markedly increased in X-ALD brain tissue, promotes IL-1 $\beta$  production and  
371 neuroinflammation and is directly neurotoxic when administrated to brain *in vivo* (66).

372

373 **25-HC, IL-1 $\beta$  production and inflammasome activation.** Consistent with the work of  
374 Jang et al (66), we provide evidence supporting a proinflammatory role of 25-HC in  
375 microglia by promoting mature 17kD IL-1 $\beta$  production via inflammasome activation.  
376 However, we did not observe any change of pro-IL-1 $\beta$  mRNA or protein levels in 25-HC  
377 treated microglia, suggesting that 25-HC augments cytokine production via a  
378 posttranslational mechanism. The induction of IL-1 $\beta$  production is dependent on two  
379 signals: first, activation of TLR4 on the cell surface by stimuli such as LPS leading to IL-  
380 1 $\beta$  mRNA generation and pro-IL-1 $\beta$  production. A second process derives from  
381 inflammasome activation by stimuli such as ATP which leads to recruitment and activation  
382 of caspase-1, a protease that cleaves pro-IL-1 $\beta$  into mature IL-1 $\beta$ . We found that 25-HC  
383 efficiently promotes IL-1 $\beta$  production in the presence of LPS, however, 25-HC does not  
384 activate IL-1 $\beta$  production by itself at either the mRNA or protein level. These observations  
385 suggest that 25-HC might directly or perhaps indirectly activate caspase-1 inflammasome  
386 activity in microglia. In fact, we observed markedly reduced IL-1 $\beta$  production when 25-HC  
387 and LPS were coincubated in the presence of the caspase-1 inhibitor VX765 or when K<sup>+</sup>  
388 efflux was blocked by high concentrations of extracellular K<sup>+</sup>. Together, these data  
389 suggest that augmentation of inflammasome activity and IL-1 $\beta$  production by 25-HC  
390 occurs post-translationally upstream of K<sup>+</sup> efflux. Our observations, together with Jang et

391 al. (66), are not consistent with the previous report by Reboldi et al. (73). In activated  
392 BMDMs, they found that low concentration of 25-HC inhibited IL-1 $\beta$  production and  
393 CH25H deficiency caused augmented transcription and secretion of the cytokine IL-1 $\beta$ .  
394 They also showed that 25-HC regulates IL-1 $\beta$  production via repressing SREBP-mediated  
395 transcription (73). Following this, Dang et al. later showed that up-regulating CH25H and  
396 25-HC production reduce inflammasome activity and IL-1 $\beta$  levels in LPS-activated  
397 macrophages (74). The discrepancy between our data may result from treatment  
398 conditions (such as LPS or 25HC concentrations, treatment duration time etc.) and the  
399 different cell types used in our respective experiments.

400

401 With advances in genomic sequencing and bioinformatics, more genetic risk factors and  
402 related molecular pathways have been identified as potentially important in the etiology  
403 and pathogenesis of AD. These risk genes associated with late onset-AD (LOAD) point  
404 to both lipid metabolism and immune mechanisms as contributing to AD pathology.  
405 However, how the components of two distinct essential cellular pathways are connected  
406 to clinical and pathological disease phenotypes and finally contribute to the  
407 neurodegeneration in AD patients remains unclear. Our present study has identified an  
408 interaction among APOE genotype, cholesterol metabolism to the oxysterol 25-HC and  
409 the cytokine IL-1 $\beta$  in microglia. Our data suggest that microglial expression and activation  
410 of CH25H and consequent 25-HC production may be an important mediator of the  
411 progressive neuroinflammation that characterizes neurodegenerative disorders like AD.  
412 Importantly, the proinflammatory effects of 25-HC we observe in primary microglia are  
413 APOE isoform-dependent as apoE4-expressing microglia secrete more 25-HC and are

414 markedly more sensitive to the proinflammatory actions of 25-HC than apoE2 or apoE3-  
415 expressing microglia. Thus, the immune oxysterol 25-HC may play an important role in  
416 the pathogenesis, i.e. the neuroinflammation and neurodegeneration, that characterize  
417 AD and perhaps other neurodegenerative disorders.

418  
419

## 420 **Materials and Methods:**

421 **Ethics Statement.** All experiments were conducted in accordance with relevant NIH  
422 guidelines and regulations related to the Care and Use of Laboratory Animals and  
423 human tissue. Animal procedures were performed according to protocols approved by  
424 the Research Animal Resource Center at Weill Cornell Medicine.

425 **Animals.** APPPS1-21 transgenic mouse model (54) co-expressing human APP  
426 KM670/671NL and Presenilin 1 L166P under the control of a neuron-specific Thy1  
427 promoter element was kindly provided by Dr. Mathias Jucker through an agreement with  
428 Koesler. These mice were intercrossed and maintained on a C57BL/6J background.  
429 PS19 expressing human P301S tau under PrP promotor were purchased from Jackson  
430 laboratory (#008169) and backcrossed and maintained on a C57BL/6 background.  
431 CH25H knockout mice (75) were purchased from the Jackson laboratory (JAX stock  
432 #016263) and maintained as homozygotes. Human APOE targeted replacement mice  
433 with the human APOE2, APOE3 or APOE4 coding sequences inserted behind the  
434 endogenous murine APOE promoter on a C57BL/6 J background were provided by  
435 P.M. Sullivan of Duke University (56-58). APOE<sup>-/-</sup> mice were purchased from Taconic.  
436 P301S tau transgenic mice that are homozygous for human APOE2 (TE2), APOE3  
437 (TE3), APOE4 (TE4) or with no expression of apoE (TEKO) (C57BL/6) were generated

438 by the Holtzman laboratory at Washington University, St. Louis as described previously  
439 (37). TLR4 knockout mice were purchased from the Jackson laboratory (JAX stock  
440 #029051) and maintained as homozygotes. All animals were maintained in a pathogen-  
441 free environment, and experiments on mice were conducted according to the protocol  
442 approved by the Weill Cornell Medicine Animal Care Committee.

443 **Human brain specimens.** Frontal cortical tissue samples from AD patients or age-  
444 matched controls with no reported clinical signs of dementia ( $\geq 80$  yrs) were obtained  
445 from the Brain Bank of the University of Miami Miller School of Medicine, the Human  
446 Brain and Spinal Fluid Resource Center of the Greater Los Angeles VA Healthcare  
447 System at the West Los Angeles Healthcare Center, University of Maryland Brain and  
448 Tissue Bank, and the New York Brain Bank at Columbia University through requests  
449 from the NIH NeuroBioBank. All procedures were approved by the Weill Cornell  
450 Medicine Human Biology Research Ethics Committee.

451 **Culture and treatment of primary microglia.** Primary neonatal microglia were  
452 prepared from cerebral cortices of 1-3 day old neonatal mice as previously described  
453 (76). Cell suspensions of cerebral cortices were seeded into a 75 ml flask and cultured  
454 in DMEM/F12 medium containing 10% FBS and 5ng/ml GM-CSF. Microglial cells  
455 floating on top of the astrocyte layer were harvested at 12 DIV by shaking for 2 hrs at  
456 200 rpm and seeded onto 48 well ( $3 \times 10^5$ /well) or 24 well ( $6 \times 10^5$ /well) culture plate in  
457 DMEM/ F12/10%FBS medium without GM-CSF. Over 98% of the cells were determined  
458 to be microglia (Iba-1 positive) by immunohistochemistry. After seeding for 24 hrs, cells  
459 were washed once with serum-free medium and treated with various reagents in serum-  
460 free DMEM/F12 medium supplemented with 0.02% BSA. The reagents used in

461 microglia treatment were: LPS (Sigma, L5293, Escherichia coli, 0111:B4); ATP (sigma  
462 A2383); 25-hydroxycholesterol (Avanti#700019 or Sigma H1015); cholesterol  
463 (Avanti#700100); 7  $\alpha$ -hydroxycholesterol (Avanti#700034); VX-765 (Medchemexpress).  
464 Ent-25-hydroxycholesterol was synthesized as described (77).

465 **Cytokine ELISAs.** Supernatants from cell cultures were collected and the  
466 concentrations of IL-1 $\beta$  (BioLegend#432601), IL-1 $\alpha$  (Biolegend#433401), IL-6 (Bon  
467 Opus Biosciences#BE010059B), and TNF $\alpha$  (Biolegend#430901) were determined by  
468 ELISA according to the manufacturer's instructions. All cytokine levels were normalized  
469 to microglial protein levels determined by BCA assay.

470 **ASC speck analysis:** For measuring ASC speck formation, mouse primary microglia  
471 were seeded at  $0.15 \times 10^6$ /well in 8-well chamber Millicell EZ slides (Millipore  
472 PEZGS0816) and allowed to attach overnight. The following day, the cells were treated  
473 with 100ng/ml LPS in the presence of absence of 10 $\mu$ g/ml 25-HC over 16hrs. The cells  
474 were fixed in 4% paraformaldehyde and then washed three times in PBS with Tween 20  
475 (PBST). After permeabilization with Triton X-100 and blocking with 10% bovine serum  
476 albumin in PBS, the cells were incubated with anti-mouse ASC antibody (Cell  
477 Signaling#67824) overnight at 4°C. After washing with PBST, the cells were incubated  
478 with secondary antibodies (Jackson ImmunoResearch) in PBS for 30 min and rinsed in  
479 PBST. The slides were mounted with mounting solution containing DAPI. Images were  
480 taken using a Nikon *eclipse* 80i microscope. For each treatment condition, 3-5 pictures  
481 taken from different areas in the well at 20x magnification were used for counting cells  
482 containing ASC speck. The total number of cells was determined by visualizing DAPI  
483 positive nuclei. Each experimental condition was repeated more than three times.

484 **Immunoblotting.** To detect CH25H protein, microsomal membranes were prepared as  
485 described previously (75, 78), solubilized in a small volume of buffer A (50 mM Tris-Cl,  
486 pH 7.4, 1mM EDTA, 0.05% (w/v) SDS), mixed with an equal amount of HMG-CoA  
487 solubilization buffer (62.5 mM Tris-Cl, pH6.8, 15% SDS, 8 M urea, 10% glycerol, 100  
488 mM dithiothreitol). 100 µg lysate was incubated with NuPAGE LDS sample buffer at  
489 37C for 20min followed with separation by NuPAGE 4-12% Bis-Tris gel and transferring  
490 to nitrocellulose membrane (Amersham Biosciences). For other proteins, cell lysates  
491 (~40µg of protein/lane) were resolved in 4-20% Bis-Tris gels and transferred to  
492 nitrocellulose membranes. Blots were incubated with antibodies at 4°C overnight  
493 followed by horseradish peroxidase-coupled secondary antibodies and ECL developing  
494 kits (Amersham Biosciences). The images were taken using Bio-Rad Molecular-Imager  
495 ChemiDoc XRS+ and densitometry of the bands was measured with Bio-Rad Image lab  
496 software and all values were normalized to β-actin or glyceraldehyde-3-phosphate  
497 dehydrogenase (GAPDH). Antibodies used for immunoblotting were: mouse anti-human  
498 CH25H (hybridoma supernatant, neat, kindly provided by Dr. David Russell, University  
499 of Texas, Southwestern medical center)(75), mouse anti-GAPDH antibody (GeneTex,  
500 GT239), mouse-anti-β-actin (GeneTex, GT5512), mouse anti-human 6E10 for full length  
501 APP (Covance, SIG393206), rabbit anti-mouse ASC antibody (Cell Signaling#67824),  
502 mouse anti-NLRP3 (AdipoGen, Cryo2, AG-20B-0014-C100), mouse anti-GM130 (Santa  
503 Cruz, sc-55591), rabbit anti-IL-1β (Abcam, ab9722).

504 **Quantification of 25-hydroxycholesterol.** Primary microglia were prepared and  
505 treated as described above. Media was collected and frozen at -80°C after removing  
506 floating cells. For each sample, 5 µL of methanol or 5 µL of deuterated internal standard

507 at a concentration of 500 ng/mL were added to 50  $\mu$ L of microglia growth media  
508 separately before being mixed and then hydrolyzed using 1N KOH at 90°C for two  
509 hours. The samples were then liquid-liquid extracted with methyl tert-butyl ether and  
510 the organic phase evaporated to dryness under air at 50°C. Sample residues were  
511 reconstituted in 100  $\mu$ L of 80% methanol. Reconstituted samples (5 $\mu$ l) were then  
512 injected onto an Eksigent microLC 200 system. Separation was effected with a Waters  
513 Acquity 1 mm x 50 mm C18 reverse-phase column at 50  $\mu$ L/min over seven minutes.  
514 Data were acquired by an ABSciex QTRAP 5500 mass spectrometer using the Turbo  
515 Spray source maintained at 300°C. Spray voltage was maintained at 4000 volts, curtain  
516 gas at 40 L/min, gas 1 at 30 L/min, and gas 2 at 30 L/min. Chromatographic peak areas  
517 of transition 385.4/367.4 (CE=25V, DP=60V) were integrated and quantified using  
518 MultiQuant 3.0 software (ABSciex).

519 **RNA Isolation, Real-time RT-PCR and nanostring analysis:** Total RNA was isolated  
520 from primary microglia or mouse brain tissue with the PureLink RNA mini kit  
521 (Invitrogen#12183018A) and reverse transcribed to cDNA using SuperScript IV VILO  
522 Master Mix with ezDNase Enzyme (Thermo Fisher, # 11766050) following the  
523 manufacturer's protocol. Quantitative real time PCR were performed using Taqman  
524 gene expression assays and gene expression master mix (Applied Biosystems,  
525 #4369016). The changes in gene expression were normalized to  $\beta$ -actin or  
526 glyceraldehyde-3-phosphate dehydrogenase (GAPDH).

527 **Statistical Analysis.** Data are expressed as mean  $\pm$  SEM. Significance was assessed  
528 with Student's *t*-test, one-way or two-way ANOVA followed by Tukey multiple

529 comparisons test or Bonferroni's post hoc test using Prism version 8.0 software  
530 (GraphPad).

531  
532 **Acknowledgements:**

533 We thank our colleagues in the Appel Alzheimer's Disease Research Institute for  
534 assistance and suggestions. We thank Dr. Li Gan for her critical comments for this  
535 work.

536  
537 **Authors' contributions:**

538 SMP and WL conceived the project and designed the experiments. MYW, ML, JJD, YS,  
539 SMP and WL analyzed the data. MYW, SMP and WL wrote the paper. MYW, ML, YS,  
540 JD and WL performed all experiments, with help or guidance from PMS, DFC, DMH and  
541 GAP. MQ synthesized *ent*-25-HC as previously described(77). All authors read and  
542 commented on the manuscript.

543  
544 **Funding:**

545 The research was supported by the research fund provided by the Appel Alzheimer's  
546 Disease Research Institute in Weill Cornell Medicine, by the National Institutes of Health  
547 (NS090934 and AG047644 [to D.M. Holtzman] and MH110550 [to D.F.C]), the JPB  
548 Foundation (to D.M. Holtzman).

549  
550 **Potential Conflicts of Interest:**

551 S.M. Paul is a founder, board member and shareholder of Sage Therapeutics and  
552 Voyager Therapeutics. He's also CEO, board member and shareholder of Karuna



553 Therapeutics and a board member and shareholder of Alnylam Pharmaceuticals as well  
554 as a venture partner at Third Rock Ventures. D.F. Covey is a founder and shareholder  
555 in Sage Therapeutics. J Doherty and M Lewis are employees and shareholders of Sage  
556 Therapeutics. D.M. Holtzman is listed as inventor on a patent licensed by Washington  
557 University to C2N Diagnostics on the therapeutic use of anti-tau antibodies. D.M.  
558 Holtzman co-founded and is on the scientific advisory board of C2N Diagnostics, LLC.  
559 C2N Diagnostics, LLC has licensed certain anti-tau antibodies to AbbVie for therapeutic  
560 development. D.M. Holtzman is on the scientific advisory board of Denali and consults  
561 for Genentech and Idorsia.  
562 All other authors declare no competing interests.

563

564 **References:**

- 565 1. Heneka MT, Carson MJ, El Khoury J, Landreth GE, Brosseron F, Feinstein DL, et al.  
566 Neuroinflammation in Alzheimer's disease. *Lancet Neurol.* 2015;14(4):388-405.  
567 2. Heneka MT, Golenbock DT, Latz E. Innate immunity in Alzheimer's disease. *Nat*  
568 *Immunol.* 2015;16(3):229-36.  
569 3. Landreth GE, Reed-Geaghan EG. Toll-like receptors in Alzheimer's disease. *Curr Top*  
570 *Microbiol Immunol.* 2009;336:137-53.  
571 4. Gold M, El Khoury J. beta-amyloid, microglia, and the inflammasome in Alzheimer's  
572 disease. *Semin Immunopathol.* 2015;37(6):607-11.  
573 5. Walker DG, Lue LF, Beach TG. Gene expression profiling of amyloid beta peptide-  
574 stimulated human post-mortem brain microglia. *Neurobiol Aging.* 2001;22(6):957-66.  
575 6. Akama KT, Van Eldik LJ. Beta-amyloid stimulation of inducible nitric-oxide synthase  
576 in astrocytes is interleukin-1beta- and tumor necrosis factor-alpha (TNFalpha)-dependent,  
577 and involves a TNFalpha receptor-associated factor- and NFkappaB-inducing kinase-  
578 dependent signaling mechanism. *J Biol Chem.* 2000;275(11):7918-24.  
579 7. Patel NS, Paris D, Mathura V, Quadros AN, Crawford FC, Mullan MJ. Inflammatory  
580 cytokine levels correlate with amyloid load in transgenic mouse models of Alzheimer's  
581 disease. *J Neuroinflammation.* 2005;2(1):9.  
582 8. Mrak RE, Sheng JG, Griffin WS. Glial cytokines in Alzheimer's disease: review and  
583 pathogenic implications. *Hum Pathol.* 1995;26(8):816-23.  
584 9. Griffin WS, Stanley LC, Ling C, White L, MacLeod V, Perrot LJ, et al. Brain interleukin  
585 1 and S-100 immunoreactivity are elevated in Down syndrome and Alzheimer disease. *Proc*  
586 *Natl Acad Sci U S A.* 1989;86(19):7611-5.

- 587 10. Blum-Degen D, Muller T, Kuhn W, Gerlach M, Przuntek H, Riederer P. Interleukin-1  
588 beta and interleukin-6 are elevated in the cerebrospinal fluid of Alzheimer's and de novo  
589 Parkinson's disease patients. *Neurosci Lett*. 1995;202(1-2):17-20.
- 590 11. Cacabelos R, Franco-Maside A, Alvarez XA. Interleukin-1 in Alzheimer's disease and  
591 multi-infarct dementia: neuropsychological correlations. *Methods Find Exp Clin Pharmacol*.  
592 1991;13(10):703-8.
- 593 12. Yin Z, Raj D, Saiepour N, Van Dam D, Brouwer N, Holtman IR, et al. Immune  
594 hyperreactivity of Abeta plaque-associated microglia in Alzheimer's disease. *Neurobiol*  
595 *Aging*. 2017;55:115-22.
- 596 13. Halle A, Hornung V, Petzold GC, Stewart CR, Monks BG, Reinheckel T, et al. The  
597 NALP3 inflammasome is involved in the innate immune response to amyloid-beta. *Nat*  
598 *Immunol*. 2008;9(8):857-65.
- 599 14. Taneo J, Adachi T, Yoshida A, Takayasu K, Takahara K, Inaba K. Amyloid beta  
600 oligomers induce interleukin-1beta production in primary microglia in a cathepsin B- and  
601 reactive oxygen species-dependent manner. *Biochem Biophys Res Commun*.  
602 2015;458(3):561-7.
- 603 15. Guo H, Callaway JB, Ting JP. Inflammasomes: mechanism of action, role in disease,  
604 and therapeutics. *Nat Med*. 2015;21(7):677-87.
- 605 16. Olsen I, Singhrao SK. Inflammasome Involvement in Alzheimer's Disease. *J*  
606 *Alzheimers Dis*. 2016;54(1):45-53.
- 607 17. Sheedy FJ, Grebe A, Rayner KJ, Kalantari P, Ramkhelawon B, Carpenter SB, et al.  
608 CD36 coordinates NLRP3 inflammasome activation by facilitating intracellular nucleation  
609 of soluble ligands into particulate ligands in sterile inflammation. *Nat Immunol*.  
610 2013;14(8):812-20.
- 611 18. Heneka MT, Kummer MP, Stutz A, Delekate A, Schwartz S, Vieira-Saecker A, et al.  
612 NLRP3 is activated in Alzheimer's disease and contributes to pathology in APP/PS1 mice.  
613 *Nature*. 2013;493(7434):674-8.
- 614 19. Coon KD, Myers AJ, Craig DW, Webster JA, Pearson JV, Lince DH, et al. A high-density  
615 whole-genome association study reveals that APOE is the major susceptibility gene for  
616 sporadic late-onset Alzheimer's disease. *J Clin Psychiatry*. 2007;68(4):613-8.
- 617 20. Liu CC, Liu CC, Kanekiyo T, Xu H, Bu G. Apolipoprotein E and Alzheimer disease: risk,  
618 mechanisms and therapy. *Nat Rev Neurol*. 2013;9(2):106-18.
- 619 21. Wang JC, Kwon JM, Shah P, Morris JC, Goate A. Effect of APOE genotype and  
620 promoter polymorphism on risk of Alzheimer's disease. *Neurology*. 2000;55(11):1644-9.
- 621 22. Holtzman DM, Herz J, Bu G. Apolipoprotein E and apolipoprotein E receptors:  
622 normal biology and roles in Alzheimer disease. *Cold Spring Harb Perspect Med*.  
623 2012;2(3):a006312.
- 624 23. Rebeck GW. The role of APOE on lipid homeostasis and inflammation in normal  
625 brains. *J Lipid Res*. 2017;58(8):1493-9.
- 626 24. Huynh TV, Davis AA, Ulrich JD, Holtzman DM. Apolipoprotein E and Alzheimer's  
627 disease: the influence of apolipoprotein E on amyloid-beta and other amyloidogenic  
628 proteins. *J Lipid Res*. 2017;58(5):824-36.
- 629 25. Fan YY, Cai QL, Gao ZY, Lin X, Huang Q, Tang W, et al. APOE epsilon4 allele elevates  
630 the expressions of inflammatory factors and promotes Alzheimer's disease progression: A  
631 comparative study based on Han and She populations in the Wenzhou area. *Brain Res Bull*.  
632 2017;132:39-43.

- 633 26. Gale SC, Gao L, Mikacenic C, Coyle SM, Rafaels N, Murray Dudenkov T, et al.  
634 APOepsilon4 is associated with enhanced in vivo innate immune responses in human  
635 subjects. *J Allergy Clin Immunol*. 2014;134(1):127-34.
- 636 27. Vitek MP, Brown CM, Colton CA. APOE genotype-specific differences in the innate  
637 immune response. *Neurobiol Aging*. 2009;30(9):1350-60.
- 638 28. Rodriguez GA, Tai LM, LaDu MJ, Rebeck GW. Human APOE4 increases microglia  
639 reactivity at Abeta plaques in a mouse model of Abeta deposition. *J Neuroinflammation*.  
640 2014;11:111.
- 641 29. Mannix RC, Zhang J, Park J, Zhang X, Bilal K, Walker K, et al. Age-dependent effect of  
642 apolipoprotein E4 on functional outcome after controlled cortical impact in mice. *J Cereb*  
643 *Blood Flow Metab*. 2011;31(1):351-61.
- 644 30. Bennett RE, Esparza TJ, Lewis HA, Kim E, Mac Donald CL, Sullivan PM, et al. Human  
645 apolipoprotein E4 worsens acute axonal pathology but not amyloid-beta immunoreactivity  
646 after traumatic brain injury in 3xTG-AD mice. *J Neuropathol Exp Neurol*. 2013;72(5):396-  
647 403.
- 648 31. Tu JL, Zhao CB, Vollmer T, Coons S, Lin HJ, Marsh S, et al. APOE 4 polymorphism  
649 results in early cognitive deficits in an EAE model. *Biochem Biophys Res Commun*.  
650 2009;384(4):466-70.
- 651 32. Pocivavsek A, Burns MP, Rebeck GW. Low-density lipoprotein receptors regulate  
652 microglial inflammation through c-Jun N-terminal kinase. *Glia*. 2009;57(4):444-53.
- 653 33. Colton CA, Brown CM, Cook D, Needham LK, Xu Q, Czapiga M, et al. APOE and the  
654 regulation of microglial nitric oxide production: a link between genetic risk and oxidative  
655 stress. *Neurobiol Aging*. 2002;23(5):777-85.
- 656 34. Huebbe P, Lodge JK, Rimbach G. Implications of apolipoprotein E genotype on  
657 inflammation and vitamin E status. *Mol Nutr Food Res*. 2010;54(5):623-30.
- 658 35. Guo L, LaDu MJ, Van Eldik LJ. A dual role for apolipoprotein e in neuroinflammation:  
659 anti- and pro-inflammatory activity. *J Mol Neurosci*. 2004;23(3):205-12.
- 660 36. Lynch JR, Tang W, Wang H, Vitek MP, Bennett ER, Sullivan PM, et al. APOE genotype  
661 and an ApoE-mimetic peptide modify the systemic and central nervous system  
662 inflammatory response. *J Biol Chem*. 2003;278(49):48529-33.
- 663 37. Shi Y, Yamada K, Liddel SA, Smith ST, Zhao L, Luo W, et al. ApoE4 markedly  
664 exacerbates tau-mediated neurodegeneration in a mouse model of tauopathy. *Nature*.  
665 2017;549(7673):523-7.
- 666 38. Brown MS, Goldstein JL. Suppression of 3-hydroxy-3-methylglutaryl coenzyme A  
667 reductase activity and inhibition of growth of human fibroblasts by 7-ketocholesterol. *J Biol*  
668 *Chem*. 1974;249(22):7306-14.
- 669 39. Kandutsch AA, Chen HW. Inhibition of sterol synthesis in cultured mouse cells by  
670 cholesterol derivatives oxygenated in the side chain. *J Biol Chem*. 1974;249(19):6057-61.
- 671 40. Brown MS, Goldstein JL. Cholesterol feedback: from Schoenheimer's bottle to Scap's  
672 MELADL. *J Lipid Res*. 2009;50 Suppl:S15-27.
- 673 41. Lund EG, Kerr TA, Sakai J, Li WP, Russell DW. cDNA cloning of mouse and human  
674 cholesterol 25-hydroxylases, polytopic membrane proteins that synthesize a potent  
675 oxysterol regulator of lipid metabolism. *J Biol Chem*. 1998;273(51):34316-27.
- 676 42. Russell DW. Oxysterol biosynthetic enzymes. *Biochim Biophys Acta*. 2000;1529(1-  
677 3):126-35.

- 678 43. Diczfalusy U, Olofsson KE, Carlsson AM, Gong M, Golenbock DT, Rooyackers O, et al.  
679 Marked upregulation of cholesterol 25-hydroxylase expression by lipopolysaccharide. *J*  
680 *Lipid Res.* 2009;50(11):2258-64.
- 681 44. Cyster JG, Dang EV, Reboldi A, Yi T. 25-Hydroxycholesterols in innate and adaptive  
682 immunity. *Nat Rev Immunol.* 2014;14(11):731-43.
- 683 45. Russell DW. The enzymes, regulation, and genetics of bile acid synthesis. *Annu Rev*  
684 *Biochem.* 2003;72:137-74.
- 685 46. Blalock EM, Buechel HM, Popovic J, Geddes JW, Landfield PW. Microarray analyses of  
686 laser-captured hippocampus reveal distinct gray and white matter signatures associated  
687 with incipient Alzheimer's disease. *J Chem Neuroanat.* 2011;42(2):118-26.
- 688 47. Papassotiropoulos A, Lambert JC, Wavrant-De Vrieze F, Wollmer MA, von der  
689 Kammer H, Streffer JR, et al. Cholesterol 25-hydroxylase on chromosome 10q is a  
690 susceptibility gene for sporadic Alzheimer's disease. *Neurodegener Dis.* 2005;2(5):233-41.
- 691 48. Morgan AR, Turic D, Jehu L, Hamilton G, Hollingworth P, Moskvina V, et al.  
692 Association studies of 23 positional/functional candidate genes on chromosome 10 in late-  
693 onset Alzheimer's disease. *Am J Med Genet B Neuropsychiatr Genet.* 2007;144B(6):762-70.
- 694 49. Schjeide BM, McQueen MB, Mullin K, DiVito J, Hogan MF, Parkinson M, et al.  
695 Assessment of Alzheimer's disease case-control associations using family-based methods.  
696 *Neurogenetics.* 2009;10(1):19-25.
- 697 50. Laumet G, Chouraki V, Grenier-Boley B, Legry V, Heath S, Zelenika D, et al.  
698 Systematic analysis of candidate genes for Alzheimer's disease in a French, genome-wide  
699 association study. *J Alzheimers Dis.* 2010;20(4):1181-8.
- 700 51. Orre M, Kamphuis W, Osborn LM, Jansen AHP, Kooijman L, Bossers K, et al. Isolation  
701 of glia from Alzheimer's mice reveals inflammation and dysfunction. *Neurobiol Aging.*  
702 2014;35(12):2746-60.
- 703 52. Holtman IR, Raj DD, Miller JA, Schaafsma W, Yin Z, Brouwer N, et al. Induction of a  
704 common microglia gene expression signature by aging and neurodegenerative conditions:  
705 a co-expression meta-analysis. *Acta Neuropathol Commun.* 2015;3:31.
- 706 53. Matarin M, Salih DA, Yasvoina M, Cummings DM, Guelfi S, Liu W, et al. A genome-  
707 wide gene-expression analysis and database in transgenic mice during development of  
708 amyloid or tau pathology. *Cell Rep.* 2015;10(4):633-44.
- 709 54. Radde R, Bolmont T, Kaeser SA, Coomaraswamy J, Lindau D, Stoltze L, et al. Abeta42-  
710 driven cerebral amyloidosis in transgenic mice reveals early and robust pathology. *EMBO*  
711 *Rep.* 2006;7(9):940-6.
- 712 55. Yoshiyama Y, Higuchi M, Zhang B, Huang SM, Iwata N, Saido TC, et al. Synapse loss  
713 and microglial activation precede tangles in a P301S tauopathy mouse model. *Neuron.*  
714 2007;53(3):337-51.
- 715 56. Knouff C, Hinsdale ME, Mezdour H, Altenburg MK, Watanabe M, Quarfordt SH, et al.  
716 Apo E structure determines VLDL clearance and atherosclerosis risk in mice. *J Clin Invest.*  
717 1999;103(11):1579-86.
- 718 57. Sullivan PM, Mezdour H, Quarfordt SH, Maeda N. Type III hyperlipoproteinemia and  
719 spontaneous atherosclerosis in mice resulting from gene replacement of mouse Apoe with  
720 human Apoe\*2. *J Clin Invest.* 1998;102(1):130-5.
- 721 58. Sullivan PM, Mezdour H, Aratani Y, Knouff C, Najib J, Reddick RL, et al. Targeted  
722 replacement of the mouse apolipoprotein E gene with the common human APOE3 allele

- 723 enhances diet-induced hypercholesterolemia and atherosclerosis. *J Biol Chem.*  
724 1997;272(29):17972-80.
- 725 59. Westover EJ, Covey DF. Synthesis of ent-25-hydroxycholesterol. *Steroids.*  
726 2006;71(6):484-8.
- 727 60. Dick MS, Sborgi L, Ruhl S, Hiller S, Broz P. ASC filament formation serves as a signal  
728 amplification mechanism for inflammasomes. *Nat Commun.* 2016;7:11929.
- 729 61. Wannamaker W, Davies R, Namchuk M, Pollard J, Ford P, Ku G, et al. (S)-1-((S)-2-  
730 (4-amino-3-chloro-phenyl)-methanoyl]-amino}-3,3-dimethyl-butanoyl)-pyrrolidine-2-  
731 carboxylic acid ((2R,3S)-2-ethoxy-5-oxo-tetrahydro-furan-3-yl)-amide (VX-765), an orally  
732 available selective interleukin (IL)-converting enzyme/caspase-1 inhibitor, exhibits potent  
733 anti-inflammatory activities by inhibiting the release of IL-1beta and IL-18. *J Pharmacol*  
734 *Exp Ther.* 2007;321(2):509-16.
- 735 62. Goldstein JL, DeBose-Boyd RA, Brown MS. Protein sensors for membrane sterols.  
736 *Cell.* 2006;124(1):35-46.
- 737 63. Lembo D, Cagno V, Civra A, Poli G. Oxysterols: An emerging class of broad spectrum  
738 antiviral effectors. *Mol Aspects Med.* 2016;49:23-30.
- 739 64. Gold ES, Diercks AH, Podolsky I, Podyminogin RL, Askovich PS, Treuting PM, et al.  
740 25-Hydroxycholesterol acts as an amplifier of inflammatory signaling. *Proc Natl Acad Sci U*  
741 *S A.* 2014;111(29):10666-71.
- 742 65. Chalmin F, Rochemont V, Lippens C, Clottu A, Sailer AW, Merkler D, et al. Oxysterols  
743 regulate encephalitogenic CD4(+) T cell trafficking during central nervous system  
744 autoimmunity. *J Autoimmun.* 2015;56:45-55.
- 745 66. Jang J, Park S, Jin Hur H, Cho HJ, Hwang I, Pyo Kang Y, et al. 25-hydroxycholesterol  
746 contributes to cerebral inflammation of X-linked adrenoleukodystrophy through activation  
747 of the NLRP3 inflammasome. *Nat Commun.* 2016;7:13129.
- 748 67. Pokharel SM, Shil NK, Gc JB, Colburn ZT, Tsai SY, Segovia JA, et al. Integrin activation  
749 by the lipid molecule 25-hydroxycholesterol induces a proinflammatory response. *Nat*  
750 *Commun.* 2019;10(1):1482.
- 751 68. Riemenschneider M, Mahmoodzadeh S, Eisele T, Klopp N, Schwarz S, Wagenpfeil S,  
752 et al. Association analysis of genes involved in cholesterol metabolism located within the  
753 linkage region on chromosome 10 and Alzheimer's disease. *Neurobiol Aging.*  
754 2004;25(10):1305-8.
- 755 69. Shibata N, Kawarai T, Lee JH, Lee HS, Shibata E, Sato C, et al. Association studies of  
756 cholesterol metabolism genes (CH25H, ABCA1 and CH24H) in Alzheimer's disease.  
757 *Neurosci Lett.* 2006;391(3):142-6.
- 758 70. Guven G, Vurgun E, Bilgic B, Hanagasi H, Gurvit H, Ozer E, et al. Association between  
759 selected cholesterol-related gene polymorphisms and Alzheimer's disease in a Turkish  
760 cohort. *Mol Biol Rep.* 2019;46(2):1701-7.
- 761 71. Shi Y, Holtzman DM. Interplay between innate immunity and Alzheimer disease:  
762 APOE and TREM2 in the spotlight. *Nat Rev Immunol.* 2018;18(12):759-72.
- 763 72. Zhu Y, Nwabuisi-Heath E, Dumanis SB, Tai LM, Yu C, Rebeck GW, et al. APOE  
764 genotype alters glial activation and loss of synaptic markers in mice. *Glia.* 2012;60(4):559-  
765 69.
- 766 73. Reboldi A, Dang EV, McDonald JG, Liang G, Russell DW, Cyster JG. Inflammation. 25-  
767 Hydroxycholesterol suppresses interleukin-1-driven inflammation downstream of type I  
768 interferon. *Science.* 2014;345(6197):679-84.



- 769 74. Dang EV, McDonald JG, Russell DW, Cyster JG. Oxysterol Restraint of Cholesterol  
770 Synthesis Prevents AIM2 Inflammasome Activation. *Cell*. 2017;171(5):1057-71 e11.
- 771 75. Bauman DR, Bitmansour AD, McDonald JG, Thompson BM, Liang G, Russell DW. 25-  
772 Hydroxycholesterol secreted by macrophages in response to Toll-like receptor activation  
773 suppresses immunoglobulin A production. *Proc Natl Acad Sci U S A*. 2009;106(39):16764-  
774 9.
- 775 76. Luo W, Liu W, Hu X, Hanna M, Caravaca A, Paul SM. Microglial internalization and  
776 degradation of pathological tau is enhanced by an anti-tau monoclonal antibody. *Sci Rep*.  
777 2015;5:11161.
- 778 77. Molnar KS, Dunnyak BM, Su B, Izrayelit Y, McGlasson-Naumann B, Hamilton PD, et al.  
779 Mechanism of Action of VP1-001 in cryAB(R120G)-Associated and Age-Related Cataracts.  
780 *Invest Ophthalmol Vis Sci*. 2019;60(10):3320-31.
- 781 78. Ramirez DM, Andersson S, Russell DW. Neuronal expression and subcellular  
782 localization of cholesterol 24-hydroxylase in the mouse brain. *J Comp Neurol*.  
783 2008;507(5):1676-93.  
784

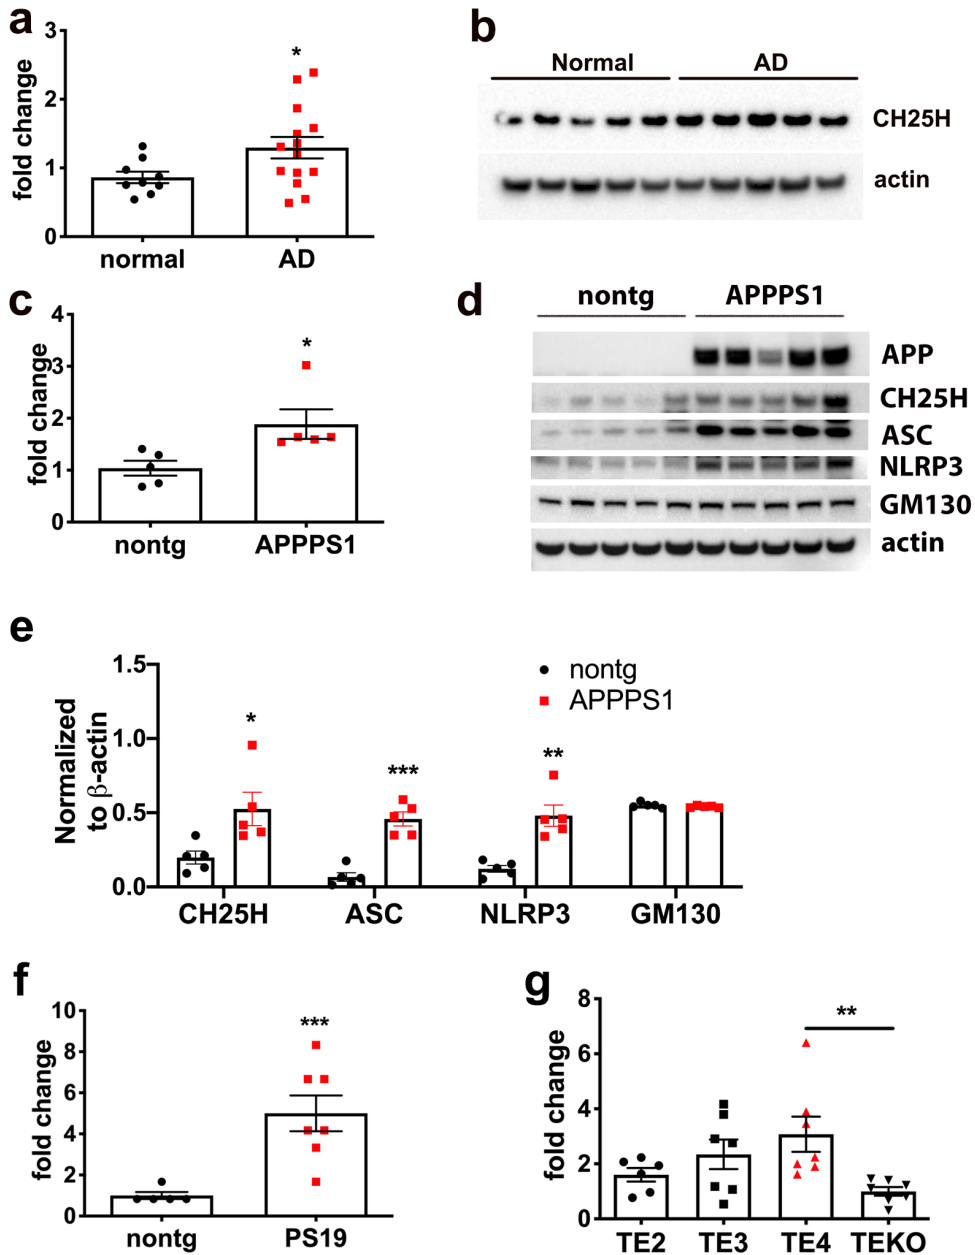

**Figure 1: CH25H expression is increased in AD brain and AD transgenic mouse brain bearing amyloid or tau pathology.** (a, b) Expression of CH25H at mRNA (a) or protein (b) levels in brain tissue of AD patients vs age-matched non-demented controls. (c,d) Expression of CH25H at mRNA (c) or protein (d) in APPS1 transgenic mouse brain vs age-matched nontg littermates. (e) Quantification of d showing protein levels for CH25H, ASC and NLRP3 by normalization to  $\beta$ -actin. (f) Expression of CH25H mRNA in PS19 tau P301S transgenic mouse brain vs non-tg littermates. (g) Expression of CH25H mRNA in TE2, TE3, TE4 and TEKO mouse brain. Statistical significance was determined by student *t*-test with  $*p < 0.05$ ,  $**p < 0.01$  or  $***p < 0.005$  in a, c, e and f, or by Ordinary one-way ANOVA with Dunnett's multiple comparisons test  $**p < 0.01$  in g.

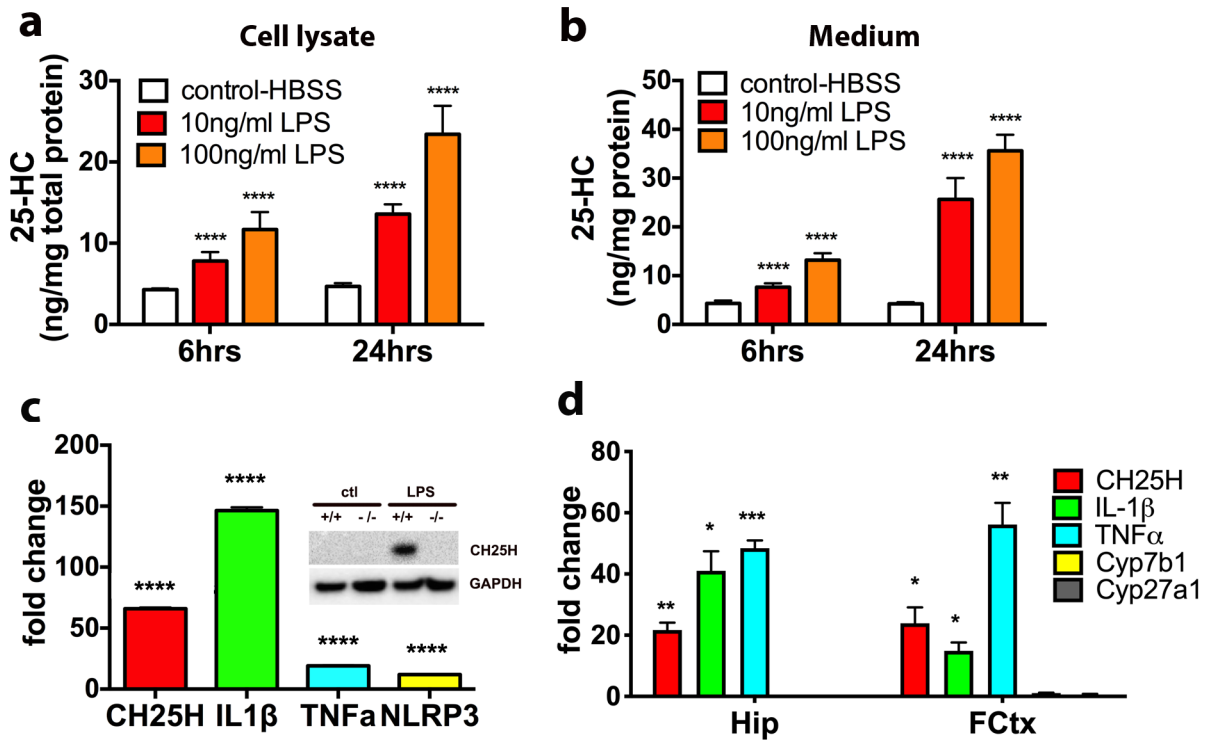

**Figure 2: LPS stimulates 25HC production and CH25H expression in primary microglia and in mouse brain.** a) LPS stimulates 25-HC production and secretion in primary microglia in a time- and dose-dependent manner. Primary microglia were treated with LPS (0, 10 and 100ng/ml) for 6 and 24 hours. The levels of 25-HC in cells (a) and media (b) were determined by GC-MS. \*\*\*\* $p < 0.001$  by ordinary one-way ANOVA. c) LPS induces the expression of CH25H, IL-1 $\beta$ , TNF $\alpha$  and NLRP3 inflammasome mRNA in primary microglia. The comparative gene expressions were determined by qPCR using RNA extracted from primary microglia with or without 10ng/ml LPS treatment for 24hrs. Insert: CH25H protein level in wt or CH25H $^{-/-}$  primary microglia treated with or without 10ng/ml LPS. It is a representative result of two independent experiments. d) Gene expression analysis of CH25H, IL-1 $\beta$ , TNF $\alpha$ , Cyp7b and Cyp27a1 in brain tissue of C57BL6 mice treated with 8.2mg/kg LPS (n=3) for 24 hours as determined by qPCR. \*  $p < 0.05$ , \*\* $p < 0.01$  \*\*\* $p < 0.005$  by student *t*-test comparing LPS-treated mouse brain to saline treated control brain.



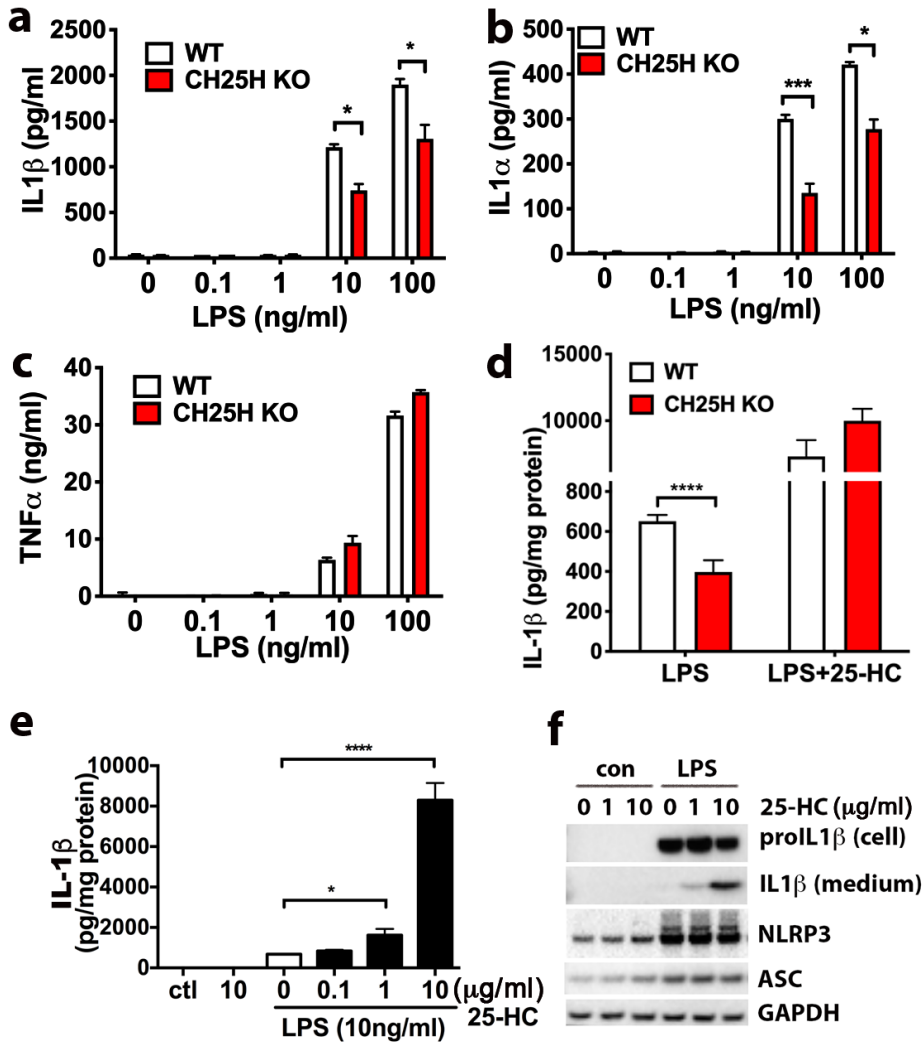

**Figure 3: 25-HC selectively amplifies LPS-induced IL-1 $\beta$  expression and secretion.** a-c) WT and CH25H KO primary microglia were treated with LPS (0, 0.1, 1, 10, 100ng/ml) for 24hrs. The levels of secreted IL-1 $\beta$  (a), IL-1 $\alpha$  (b) and TNF $\alpha$  (c) in the medium were measured by ELISA. d) The levels of secreted IL1 $\beta$  from WT and CH25H KO microglia treated with LPS (10ng/ml) with or without 25-HC (10 $\mu$ g/ml) were measured by ELISA. e) Primary microglia were treated with 10ng/ml LPS in the presence of different concentrations of 25-HC for 24 hours. The levels of IL-1 $\beta$  in the media were determined by ELISA and f) the levels of intracellular pro-IL1 $\beta$  and mature IL1 $\beta$  secreted in the media as measured by Western blotting. Statistical analyses were determined by multiple *ttest* in a, b, c, d; one-way ANOVA in e. \*  $p < 0.05$ , \*\*  $p < 0.01$ , \*\*\*  $p < 0.005$ , \*\*\*\*  $p < 0.001$ . The data shown are representative for three or more independent experiments.



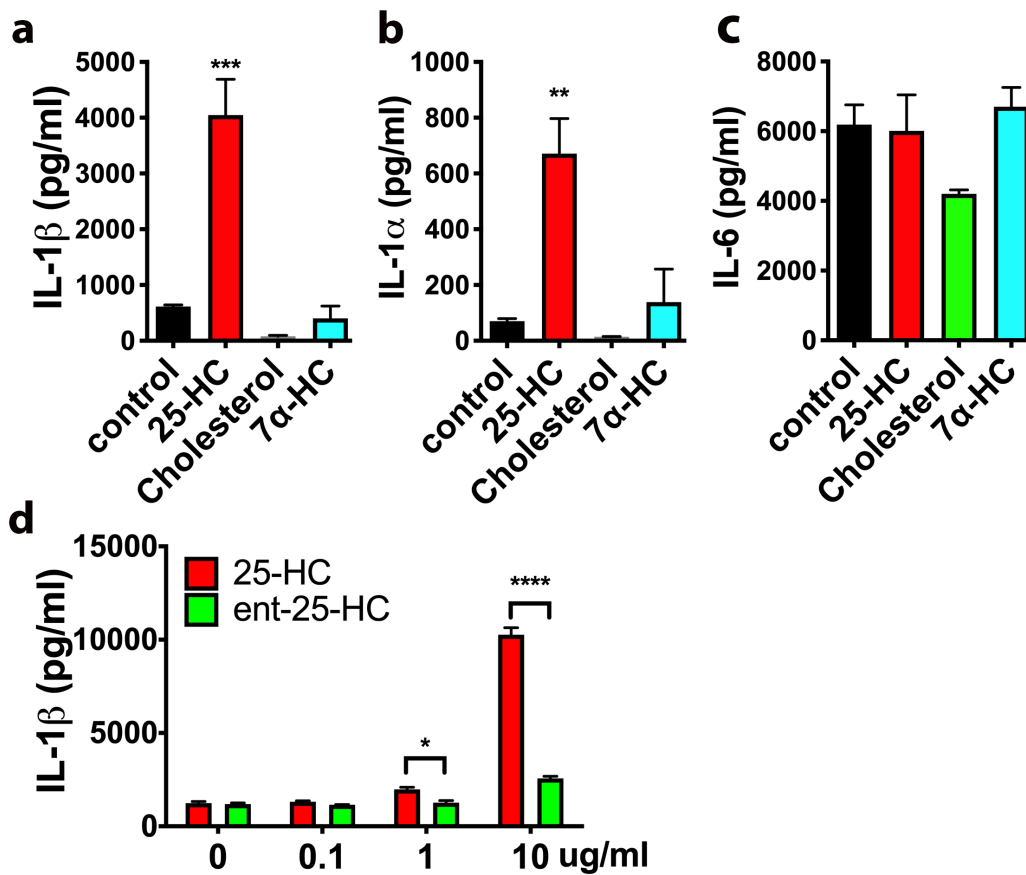

**Figure 5: IL-1β/α induction by 25-HC is highly specific.** The levels of secreted IL-1β (a), IL-1α (b) or IL-6 (c) in the medium of primary microglia treated with LPS (10ng/ml) in the presence of 25-HC (10μg/ml), Cholesterol (10μg/ml) or 7α-HC (10μg/ml) for 24 hrs. d) Ent-25-HC (10μg/ml) has much weaker effects in augmenting IL-1β production in primary microglia treated with LPS (10ng/ml) for 24hr. The levels of cytokines were determined by ELISA. Statistical significances were determined by ordinary two-way ANOVA with Tukey multiple comparisons test. \*  $p < 0.05$ , \*\*  $p < 0.01$ , \*\*\*  $p < 0.005$ , \*\*\*\*  $p < 0.001$ . The data shown are representative for two or more independent experiments.

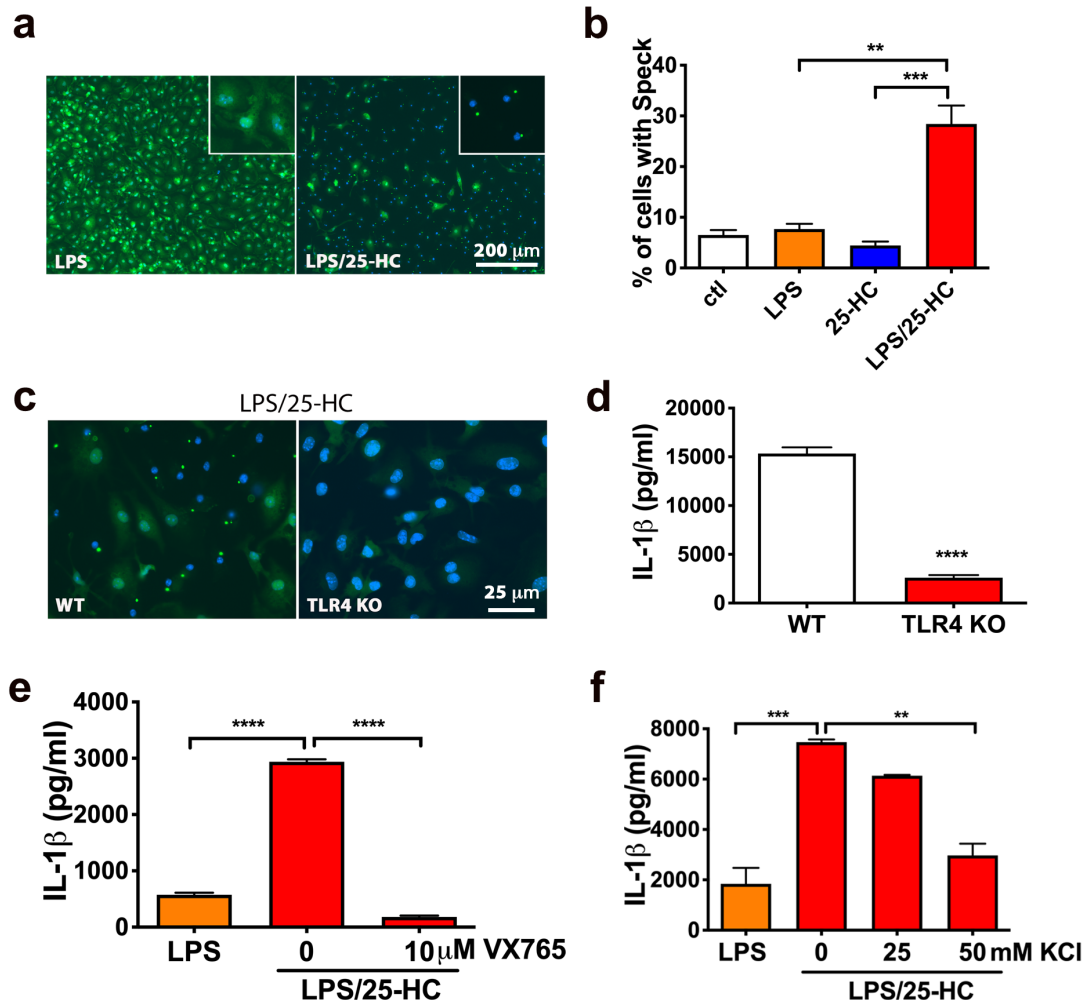

**Figure 6: 25-HC induces inflammasome activation.** ASC specks in microglia treated with LPS (10ng/ml) w/o or with 25-HC (10 $\mu$ g/ml) were stained by ASC antibody (green) and DAPI for Nuclei (blue) (a). Quantification of ASC specks in microglia treated with medium alone (ctl), medium containing LPS (10ng/ml), 25-HC (10 $\mu$ g/ml) or LPS (10ng/ml) plus 25-HC (10 $\mu$ g/ml) (b). WT or TLR4 deficient microglia were treated with LPS (10ng/ml) and 25-HC (10 $\mu$ g/ml) for 24 h followed by ASC antibody staining (green) and DAPI (blue) (c) or ELISA measurements of secreted IL1 $\beta$  (d). Inhibition of caspase 1 by VX765 (e) or a high concentration of potassium (50mM) (f) in the medium prevents 25-HC-dependent IL-1 $\beta$  production in microglia treated with 10ng/ml LPS for 24 h. Statistical analyses were determined by ordinary two-way ANOVA with Tukey multiple comparisons test in c, e and f or student *t*test in d. \*  $p < 0.05$ , \*\*  $p < 0.01$ , \*\*\*  $p < 0.005$ , \*\*\*\*  $p < 0.001$ . The data shown are representative for three or more independent experiments.
